# Supplementary material for: Short and long-term effect of dexamethasone on the transcriptome profile of primary human trabecular meshwork cells in vitro
Source: PubMed Central journal article supplement (PMC9117214; doi:10.1038/s41598-022-12443-7), 2022-05-18
Supplement: 41598_2022_12443_MOESM1_ESM.pdf [file 41598_2022_12443_MOESM1_ESM.pdf]

## **Short and Long-Term Effect of Dexamethasone on the Transcriptome Profile of Primary Human Trabecular Meshwork Cells *In vitro***

<sup>1,9,a</sup>Kandasamy Kathirvel, <sup>2,a</sup> Karen Lester, <sup>1</sup>Ravinarayanan Haribalaganesh, <sup>3</sup>Ramasamy Krishnadas, <sup>4</sup>Veerappan Muthukkaruppan, <sup>5,8</sup>Brian Lane, <sup>6</sup>David A Simpson, <sup>7,8</sup>Kasia Goljanek-Whysall, <sup>8</sup>Carl Sheridan, <sup>9</sup>Devarajan Bharanidharan, <sup>2,8</sup>Colin E. Willoughby\*, <sup>1</sup>Srinivasan Senthilkumari\*

<sup>1</sup>Department of Ocular Pharmacology, Aravind Medical Research Foundation, Madurai, Tamilnadu, India.

<sup>2</sup>Genomic Medicine, Biomedical Sciences Research Institute, Ulster University, Northern Ireland, United Kingdom.

<sup>3</sup>Glaucoma Clinic, Aravind Eye Hospital, Madurai, Tamilnadu, India.

<sup>4</sup>Advisor, Aravind Medical Research Foundation, Madurai, Tamilnadu, India.

<sup>5</sup>Translational Radiobiology Group, Division of Cancer Sciences, University of Manchester, Manchester Academic Health Science Centre, Christie NHS Foundation Trust Hospital, Manchester, M20 4BX, United Kingdom. Institute of Life Course and Medical Sciences, University of Liverpool, Liverpool, L7 8TX, United Kingdom.

<sup>6</sup>The Wellcome – Wolfson Institute for Experimental Medicine, School of Medicine, Dentistry and Biomedical Sciences, Queen’s University Belfast, United Kingdom.

<sup>7</sup>School of Medicine, Physiology, National University of Ireland Galway, Galway, H91 W5P7, Ireland.

<sup>8</sup> Department of Eye and Vision Science, Institute of Life Course and Medical Sciences, University of Liverpool, Liverpool, L7 8TX, United Kingdom.

<sup>9</sup>Department of Bioinformatics, Aravind Medical Research Foundation, Madurai, Tamilnadu, India.

### **\*Corresponding Authors:**

Srinivasan Senthilkumari, M. Pharm, Ph. D

Department of Ocular Pharmacology, Aravind Medical Research Foundation

#1, Anna Nagar, Madurai-625020, Tamilnadu, India

Tele (0): +91-452-4356550; extn. 438; Fax: +91-452-2530984;

e.mail: [ss\\_kumari@aravind.org](mailto:ss_kumari@aravind.org)

Prof. Colin E. Willoughby

Genomic Medicine, Biomedical Sciences Research Institute,

Ulster University, Northern Ireland, United Kingdom

e.mail: [c.willoughby@ulster.ac.uk](mailto:c.willoughby@ulster.ac.uk)

<sup>a</sup> Contributed equally as first authors

**Table S1:** Characteristics of Human Donor Eyes Used for the Present Study

| <b>DEX Treatment<br/>(nM)</b> | <b>Duration</b> | <b>Code</b> | <b>Age</b> | <b>Sex</b> | <b>Treatment</b> |
|-------------------------------|-----------------|-------------|------------|------------|------------------|
| 100nM (N=6)                   | 16 h            | LGP-1       | 57         | M          | ETH/DEX          |
|                               |                 | LGP-2       | 65         | M          | ETH/DEX          |
|                               |                 | NTM002      | 57         | M          | ETH/DEX          |
|                               |                 | NTM009      | 57         | M          | ETH/DEX          |
|                               |                 | NTM720      | 64         | M          | ETH/DEX          |
|                               |                 | NTM119      | 94         | M          | ETH/DEX          |
| 100nM (N=8)                   | 7 d             | OCHD18-39   | 82         | F          | ETH/DEX          |
|                               |                 | OCHD18-49   | 48         | M          | ETH/DEX          |
|                               |                 | OCHD18-52   | 55         | F          | ETH/DEX          |

|  |  |           |    |   |         |
|--|--|-----------|----|---|---------|
|  |  | OCHD18-53 | 67 | M | ETH/DEX |
|  |  | OCHD18-56 | 82 | M | ETH/DEX |
|  |  | OCHD19-02 | 66 | M | ETH/DEX |
|  |  | OCHD19-03 | 65 | F | ETH/DEX |
|  |  | OCHD19-04 | 72 | M | ETH/DEX |

**Table S2: Primer Pairs for RNA-Seq Validation (16 h)**

| S. No | Gene Target | Primer Sequence                |                                 |
|-------|-------------|--------------------------------|---------------------------------|
|       |             | 16 hours                       | 7 days                          |
| 1     | FKBP5       | F:5'CTCCCTAAAATTCCCTCGAATGC'3  | F:5'-AAGGCCAAGTCATCAAGGCA-3'    |
|       |             | R:5'CCCTCTCCTTTCCGTTTGGTT'3    | R:5'-TGAAATCAAGGAGCTCAATCTC-3'  |
| 2     | FST         | F:5'AGGCAAGATGTAAAGAGCAGC'3    | F:5'-GCTGTGCCCTGACAGTAAGT-3'    |
|       |             | R:5'CAGTAGGCATTATTGGTCTGGTC'3  | R:5'-GTGTCTTCCGAAATGGAGTTGC-3'  |
| 3     | MMP1        | F: 5'ACGGATACCCCAAGGACATCT'3   | F:5'-ACGGATACCCCAAGGACATCT-3'   |
|       |             | R: 5'TCAGAAAGAGCATCGATATG'3    | R:5'-TCAGAAAGAGCAGCATCGATATG-3' |
| 4     | PDPN        | F: 5'AACCAGCGAAGACCGCTATAA'3   | F:5'-AACCAGCGAAGACCGCTATAA-3'   |
|       |             | R: 5'CGAATGCCTGTTACTACTGTTGA'3 | R:5'-CGAATGCCTGTTACTACTGTTGA-3' |
| 5     | PTK2B       | F: 5'CCCCTGAGTCGAGTAAAGTTGG'3  | F:5'-CCCCTGAGTCGAGTAAAGTTGG-3'  |
|       |             | R: 5'GATACGCACGTCCTCCTTTTC'3   | R:5'-GATACGCACGTCCTCCTTTTC-3'   |
| 6     | RGCC        | F: 5'CGCCACTTCCACTACGAGG'3     | F:5'-CGCCACTTCCACTACGAGG-3'     |
|       |             | R: 5'CAGCAATGAAGGCTTCTAGCTC'3  | R:5'-CAGCAATGAAGGCTTCTAGCTC-3'  |
| 7     | SERPIN2     | F: 5'TCCTGGGTCAAGACTCAAACC'3   | F:5'-TCCTGGGTCAAGACTCAAACC-3'   |
|       |             | R: 5'CATCCTGGTATCCCCATCTACAG'3 | R:5'-CATCCTGGTATCCCCATCTACAG-3' |
| 8     | VEGFC       | F: 5'GAGGAGCAGTTACGGTCTGTG'3   | F:5'-GAGGAGCAGTTACGGTCTGTG-3'   |
|       |             | R: 5'TCCTTTCCTTAGCTGACACTTGT'3 | R:5'-TCCTTTCCTTAGCTGACACTTGT-3' |
| 9     | ZBTB16      | F: 5'CCTCAGACGACAATGACACGG'3   | F:5'-CCTCAGACGACAATGACACGG-3'   |
|       |             | R: 5'CTCGCTGGAATGCTTCGAGAT'3   | R:5'-CTCGCTGGAATGCTTCGAGAT-3'   |

**Table S3a:** List of top 50 Up/Down-regulated Genes from Group A

| Up-regulated genes |          |          |          | Down-regulated genes |          |          |          |
|--------------------|----------|----------|----------|----------------------|----------|----------|----------|
| Gene               | logFC    | logCPM   | P Value  | Gene                 | logFC    | logCPM   | P Value  |
| ZBTB16             | 7.6991   | 2.144367 | 3.93E-06 | TP63                 | -4.75466 | -1.9076  | 0.003015 |
| OCA2               | 6.817079 | 2.019772 | 2.63E-10 | KRTAP4-7             | -4.64115 | -2.75702 | 0.002146 |
| LEP                | 6.212262 | -1.32218 | 5.15E-04 | GJB2                 | -4.36855 | -2.86834 | 0.00134  |
| CCAT1              | 5.913344 | -2.70286 | 0.002979 | TMEM108-AS1          | -4.27057 | -0.5583  | 0.001793 |
| CIDEC              | 5.78612  | -2.78275 | 0.001021 | LRRN1                | -4.14203 | -3.63259 | 0.044332 |
| NDST4              | 5.767665 | -2.75183 | 0.010945 | FGF16                | -4.13737 | -2.99608 | 0.016576 |
| OLAH               | 5.744702 | 0.392163 | 3.05E-10 | SPATA31E1            | -4.11655 | -3.07267 | 0.006086 |
| CNR1               | 5.689774 | 0.87157  | 0.001218 | SUCNR1               | -4.09291 | -3.04633 | 0.005503 |
| FAM105A            | 5.647441 | 2.781821 | 3.79E-10 | CCDC141              | -4.08231 | -3.05163 | 0.002129 |
| SAA1               | 5.645963 | 1.380466 | 6.89E-09 | SERPINB2             | -3.73461 | 2.275158 | 6.92E-04 |
| ALOX15B            | 5.638745 | 0.257532 | 1.95E-08 | FAM19A3              | -3.7216  | -1.32076 | 4.21E-06 |
| HIF3A              | 5.4497   | -1.98756 | 4.43E-05 | GABRA4               | -3.69131 | -1.92586 | 0.011211 |
| LGI3               | 5.401532 | -0.00197 | 1.32E-07 | ELOVL2-AS1           | -3.61024 | -2.88914 | 0.013646 |
| SAA2-SAA4          | 5.290503 | -3.08574 | 8.83E-04 | IVL                  | -3.55164 | 3.96E-04 | 0.003206 |
| C7                 | 5.023251 | -3.22535 | 0.014352 | INSM2                | -3.54622 | -2.64853 | 0.032325 |
| UBA52P8            | 4.977612 | -3.26546 | 0.00223  | LCE3A                | -3.52099 | -2.26775 | 0.016712 |
| PNMT               | 4.936361 | -3.25641 | 0.003935 | LCE1C                | -3.49153 | -3.31426 | 0.019634 |
| CCL3L3             | 4.891576 | -3.29353 | 0.012138 | NTSR1                | -3.47662 | 0.253475 | 0.008717 |
| ALOX5AP            | 4.836676 | -0.54226 | 2.57E-07 | TGFA                 | -3.42263 | 0.170103 | 0.006218 |
| FAM107A            | 4.811483 | 0.917285 | 1.42E-05 | CXCR4                | -3.41723 | -1.98838 | 0.010154 |
| RGCC               | 4.790965 | 3.861133 | 0.001081 | KRT19                | -3.40331 | 4.891026 | 1.92E-05 |
| LINC00964          | 4.523061 | -2.6008  | 0.001364 | RNU6-118P            | -3.39061 | -3.38484 | 0.035994 |
| ACKR1              | 4.504368 | 0.126657 | 0.021377 | MS4A12               | -3.36186 | -3.42068 | 0.043333 |
| CADM3-AS1          | 4.46674  | -3.48871 | 0.034944 | TNFRSF9              | -3.31793 | -2.97307 | 0.025971 |
| OR3A1              | 4.426009 | -3.48658 | 0.010772 | NR1D1                | -3.1518  | 2.813576 | 1.65E-12 |
| H19                | 4.419902 | 0.243194 | 3.86E-04 | SLC7A14              | -3.14203 | 1.990144 | 1.45E-04 |
| RBMV1A3P           | 4.373364 | -3.52879 | 0.027555 | FER1L6               | -3.14159 | -2.30399 | 0.010493 |
| ANGPTL7            | 4.286227 | 1.043775 | 0.001021 | MCHR1                | -3.09605 | 0.077106 | 0.002953 |
| APOB               | 4.261701 | -1.74598 | 0.01705  | CYTIP                | -3.06451 | -2.15903 | 0.014672 |
| LINC00332          | 4.254916 | -2.83157 | 0.012106 | CSF2                 | -3.05834 | -0.79702 | 0.00393  |
| ZNF840             | 4.240351 | -3.57816 | 0.032746 | RNU6-137P            | -2.9772  | -3.26842 | 0.007867 |
| PDK4               | 4.141157 | 2.437951 | 4.46E-07 | CDC20B               | -2.97361 | -2.95319 | 0.017313 |
| MOB3B              | 4.110102 | 0.242993 | 1.66E-05 | KRT16                | -2.89471 | -0.55725 | 0.028857 |
| SLC17A3            | 3.898265 | -2.99778 | 0.009722 | KRTAP4-12            | -2.81493 | -2.89381 | 0.019184 |
| ADH1B              | 3.893459 | 1.189551 | 0.014387 | TACR1                | -2.74512 | -1.82516 | 0.007374 |
| SAA2               | 3.816066 | -1.28468 | 6.66E-04 | EVI2A                | -2.72873 | -1.2672  | 7.51E-04 |

|          |          |          |          |
|----------|----------|----------|----------|
| OMD      | 3.759902 | 0.540711 | 1.32E-04 |
| IP6K3    | 3.756283 | 1.007611 | 4.38E-07 |
| IL18     | 3.712121 | -1.16629 | 0.001141 |
| LIX1     | 3.620558 | -2.37076 | 0.014003 |
| MARCH10  | 3.612298 | -0.59562 | 1.25E-04 |
| CD163    | 3.570825 | -1.86626 | 0.031175 |
| KDF1     | 3.503209 | -2.82669 | 0.029132 |
| CDH20    | 3.485157 | 2.805804 | 2.95E-07 |
| C10orf10 | 3.451466 | 4.12064  | 2.47E-04 |
| NKD1     | 3.450642 | -1.5778  | 0.004903 |
| MAOA     | 3.445347 | 5.513373 | 2.42E-13 |
| WISP1    | 3.442528 | 2.116349 | 0.002748 |
| KLF15    | 3.415696 | 0.338311 | 5.41E-04 |
| STK31    | 3.386502 | -2.10787 | 0.012172 |

|           |          |          |          |
|-----------|----------|----------|----------|
| EBF3      | -2.72184 | -2.56649 | 0.03766  |
| GRPR      | -2.66534 | 1.046002 | 4.37E-06 |
| IL1B      | -2.62255 | 2.070758 | 1.37E-04 |
| CSNK1A1P1 | -2.61533 | -2.28419 | 0.024971 |
| ESM1      | -2.56555 | 6.962024 | 0.019522 |
| GRIN2A    | -2.54737 | -0.36879 | 0.002351 |
| TRIML2    | -2.54023 | -1.33735 | 0.010246 |
| BCL2A1    | -2.52814 | -1.33764 | 0.0081   |
| IL1RN     | -2.51691 | -0.78863 | 0.019984 |
| ERMN      | -2.49034 | -0.56562 | 0.002515 |
| PTHLH     | -2.4542  | 1.947604 | 0.002709 |
| FST       | -2.45314 | 7.46288  | 1.43E-05 |
| ALDH1A3   | -2.4271  | 5.95997  | 2.56E-09 |
| KCNK3     | -2.42547 | 0.497296 | 0.04803  |

Note: *Group A*: DEGs between DEX and ETH treated for short duration (16h)

**Table S3b:** List of top 50 Up/Down-regulated Genes from Group B.

| Up-regulated genes |          |          |          | Down-regulated genes |          |          |          |
|--------------------|----------|----------|----------|----------------------|----------|----------|----------|
| Gene               | logFC    | logCPM   | P Value  | Gene                 | logFC    | logCPM   | P Value  |
| ZBTB16             | 6.469771 | 4.645611 | 2.79E-22 | NPY                  | -6.70151 | 2.337886 | 2.66E-04 |
| SAA1               | 6.219889 | 2.214826 | 9.59E-11 | PRSS22               | -6.38518 | -1.47254 | 8.02E-04 |
| MYOC               | 5.786683 | 8.501142 | 6.47E-05 | LRRC26               | -6.30496 | 0.500688 | 0.001154 |
| OCA2               | 5.710359 | 1.977641 | 5.91E-12 | HOXB13               | -6.26252 | 1.925207 | 0.001245 |
| H19                | 5.52922  | 8.142276 | 6.91E-11 | ACPP                 | -6.24787 | 5.740014 | 1.63E-04 |
| BHLHE22            | 4.795929 | -0.16536 | 0.005898 | RLN1                 | -6.19291 | 0.229894 | 0.001526 |
| APOD               | 4.740998 | 8.023247 | 1.18E-04 | KLK3                 | -6.19217 | 6.494438 | 3.79E-04 |
| SAA2               | 4.655101 | -0.07569 | 1.30E-04 | PRAC1                | -6.081   | -1.02086 | 0.002144 |
| HIF3A              | 4.598946 | 3.556768 | 4.05E-07 | GIMAP1               | -6.03295 | -1.72779 | 1.51E-04 |
| PRODH              | 4.54025  | 2.918714 | 3.66E-11 | KLK2                 | -6.00607 | 5.321405 | 8.81E-04 |
| FKBP5              | 4.467148 | 7.460413 | 3.19E-23 | KLK4                 | -5.94843 | 2.034524 | 0.002213 |
| P2RY14             | 4.355578 | 1.076507 | 6.20E-08 | AQP1                 | -5.90064 | 6.706375 | 6.83E-09 |
| LSP1               | 4.283072 | 5.109946 | 4.60E-09 | MSMB                 | -5.77753 | 2.981128 | 0.002492 |
| SCN3A              | 4.248788 | 2.547229 | 7.88E-05 | ST14                 | -5.77001 | 0.500316 | 7.21E-04 |
| ANGPTL7            | 4.233551 | 9.075265 | 0.001147 | PAGE4                | -5.67683 | -0.50939 | 0.003169 |
| PRR33              | 4.182477 | 0.924015 | 3.21E-08 | TPSAB1               | -5.66112 | -0.27503 | 7.08E-04 |
| CPM                | 4.017027 | 3.646993 | 1.90E-07 | TPSB2                | -5.64276 | -0.02604 | 0.001383 |
| LEP                | 3.854555 | -0.92605 | 0.002286 | KRT15                | -5.59983 | 2.359236 | 7.93E-05 |
| IGF2               | 3.777841 | 6.594018 | 2.10E-09 | LINC01297            | -5.42824 | 0.161739 | 0.001658 |
| IGF2-AS            | 3.771141 | -1.96988 | 3.91E-04 | HOXA10               | -5.36139 | -0.80501 | 3.15E-04 |
| ADH1B              | 3.707569 | 7.121667 | 7.38E-06 | GIMAP7               | -5.35117 | -1.16462 | 0.003777 |
| RGCC               | 3.592186 | 1.824843 | 7.12E-04 | IGHG3                | -5.30586 | 1.084123 | 0.009352 |
| LINC00702          | 3.565781 | 4.414582 | 8.68E-08 | HOXA9                | -5.2873  | -1.6163  | 0.005055 |
| SLC16A12           | 3.545497 | 0.904799 | 2.16E-06 | HLA-DQB1             | -5.27142 | 0.069513 | 0.003274 |
| ANGPTL1            | 3.539448 | 3.075954 | 4.72E-08 | KRT5                 | -5.2671  | 1.442267 | 3.34E-04 |
| SAMHD1             | 3.46755  | 7.654626 | 4.37E-14 | UPK3A                | -5.23658 | -0.57963 | 0.009173 |
| FHL5               | 3.453078 | -0.55363 | 0.001374 | AZGP1                | -5.23442 | 3.090287 | 0.003695 |
| LINC01088          | 3.439059 | 1.030156 | 2.67E-06 | IGLC3                | -5.23234 | 0.617578 | 0.005658 |
| STEAP4             | 3.272005 | 2.873029 | 4.60E-04 | RAMP3                | -5.22737 | -0.65501 | 0.001978 |
| MAOA               | 3.219507 | 4.53732  | 7.03E-05 | COL9A1               | -5.18985 | 1.745759 | 2.42E-05 |
| TRAV39             | 3.184529 | -1.04837 | 0.002723 | DES                  | -5.18691 | 4.97087  | 5.67E-05 |
| FMO2               | 3.162058 | 2.670166 | 4.63E-05 | MT1H                 | -5.17696 | -2.24801 | 0.003385 |
| ANKRD2             | 3.10094  | 0.494111 | 6.55E-04 | FXYD3                | -5.16764 | 1.00437  | 6.76E-04 |
| CHI3L2             | 3.019697 | 3.101092 | 0.003799 | CCDC64B              | -5.16744 | -0.4844  | 6.07E-04 |
| STOX1              | 2.978317 | 1.660544 | 0.005573 | MMP7                 | -5.16594 | 0.817164 | 6.99E-04 |
| KCNE1              | 2.952832 | 0.259925 | 9.97E-04 | CHRNA2               | -5.16025 | 0.306457 | 0.001386 |



|           |          |          |          |           |          |          |          |
|-----------|----------|----------|----------|-----------|----------|----------|----------|
| GIP       | 2.952648 | -1.75823 | 8.43E-04 | GYLTL1B   | -5.0962  | -0.77806 | 8.74E-04 |
| MRO       | 2.927396 | 1.824722 | 0.001177 | PLVAP     | -5.06443 | 0.634955 | 5.30E-04 |
| MIR5690   | 2.9135   | -1.95506 | 0.0026   | SPDEF     | -5.00996 | 1.499005 | 8.58E-04 |
| TLDC2     | 2.904924 | 1.184351 | 1.31E-06 | CD177     | -4.98374 | 0.275334 | 0.002824 |
| ADRA1B    | 2.895918 | 2.880945 | 2.01E-09 | SERPINB11 | -4.96923 | -0.10361 | 0.002876 |
| ADH1A     | 2.88262  | 1.394164 | 3.12E-04 | DIO3OS    | -4.93426 | -1.17936 | 0.007826 |
| NTRK2     | 2.871932 | 5.180909 | 0.003317 | SFN       | -4.93102 | 0.825148 | 7.12E-05 |
| XRCC6P2   | 2.858951 | -0.32354 | 2.88E-05 | KCNQ1     | -4.9203  | -1.8196  | 0.007267 |
| NEDD9     | 2.790817 | 7.654906 | 1.77E-05 | HOXA13    | -4.91558 | 0.125708 | 4.15E-04 |
| USP2      | 2.754429 | 2.387434 | 9.92E-05 | FAM110D   | -4.90182 | -1.43618 | 0.006624 |
| LINC00525 | 2.716197 | -2.25042 | 0.003534 | IRX4      | -4.89999 | -1.83535 | 0.004901 |
| SLC16A10  | 2.714817 | 0.999613 | 0.001783 | HLA-DRA   | -4.88604 | 1.815739 | 0.002646 |
| NRCAM     | 2.694034 | 4.941819 | 0.004455 | C1orf116  | -4.87612 | 0.877927 | 2.02E-04 |
| FAS-AS1   | 2.693421 | -2.50119 | 0.011674 | PDE9A     | -4.84261 | 0.385632 | 2.25E-05 |

Note: *Group B*: DEGs between DEX and ETH treated for longer duration (7d)

**Table S3c:** List of overlapping genes from Group C

| Gene      | Group A  |          |          | Group B  |          |          |
|-----------|----------|----------|----------|----------|----------|----------|
|           | logFC    | logCPM   | P Value  | logFC    | logCPM   | P Value  |
| ZBTB16    | 7.6991   | 2.144367 | 3.93E-06 | 6.469771 | 4.645611 | 2.79E-22 |
| OCA2      | 6.817079 | 2.019772 | 2.63E-10 | 5.710359 | 1.977641 | 5.91E-12 |
| LEP       | 6.212262 | -1.32218 | 5.15E-04 | 3.854555 | -0.92605 | 0.002286 |
| OLAH      | 5.744702 | 0.392163 | 3.05E-10 | 2.494219 | 1.630462 | 3.80E-04 |
| SAA1      | 5.645963 | 1.380466 | 6.89E-09 | 6.219889 | 2.214826 | 9.59E-11 |
| HIF3A     | 5.4497   | -1.98756 | 4.43E-05 | 4.598946 | 3.556768 | 4.05E-07 |
| LGI3      | 5.401532 | -0.00197 | 1.32E-07 | 2.023395 | -0.28967 | 0.023957 |
| C7        | 5.023251 | -3.22535 | 0.014352 | -2.47034 | 1.612644 | 0.041657 |
| RGCC      | 4.790965 | 3.861133 | 0.001081 | 3.592186 | 1.824843 | 7.12E-04 |
| H19       | 4.419902 | 0.243194 | 3.86E-04 | 5.52922  | 8.142276 | 6.91E-11 |
| ANGPTL7   | 4.286227 | 1.043775 | 0.001021 | 4.233551 | 9.075265 | 0.001147 |
| PDK4      | 4.141157 | 2.437951 | 4.46E-07 | 2.600955 | 5.120345 | 5.04E-06 |
| MOB3B     | 4.110102 | 0.242993 | 1.66E-05 | 2.535956 | 2.25653  | 2.67E-04 |
| ADH1B     | 3.893459 | 1.189551 | 0.014387 | 3.707569 | 7.121667 | 7.38E-06 |
| SAA2      | 3.816066 | -1.28468 | 6.66E-04 | 4.655101 | -0.07569 | 1.30E-04 |
| MARCH10   | 3.612298 | -0.59562 | 1.25E-04 | 2.047767 | -0.92857 | 0.022404 |
| MAOA      | 3.445347 | 5.513373 | 2.42E-13 | 3.219507 | 4.53732  | 7.03E-05 |
| KLF15     | 3.415696 | 0.338311 | 5.41E-04 | 2.285    | 4.633049 | 1.13E-10 |
| CPM       | 3.084205 | 3.505109 | 0.001022 | 4.017027 | 3.646993 | 1.90E-07 |
| MRO       | 2.928403 | 1.525505 | 0.021691 | 2.927396 | 1.824722 | 0.001177 |
| SLCO2A1   | 2.918312 | -1.4591  | 0.033547 | -4.67337 | 0.103155 | 5.64E-04 |
| FKBP5     | 2.910129 | 7.361695 | 2.02E-10 | 4.467148 | 7.460413 | 3.19E-23 |
| RASSF6    | 2.846302 | -1.81284 | 0.003284 | -2.43413 | -2.057   | 0.046611 |
| ITGA10    | 2.731467 | 3.131551 | 1.34E-05 | 2.067832 | 5.009811 | 1.16E-04 |
| SLC16A12  | 2.599798 | 1.421226 | 0.00106  | 3.545497 | 0.904799 | 2.16E-06 |
| GIP       | 2.442996 | -1.55192 | 0.002565 | 2.952648 | -1.75823 | 8.43E-04 |
| ANGPTL1   | 2.344392 | 2.343466 | 0.01012  | 3.539448 | 3.075954 | 4.72E-08 |
| PLCE1-AS1 | 2.336548 | 3.074643 | 4.05E-04 | 2.278802 | 4.093517 | 1.11E-04 |
| NRCAM     | 2.294725 | 5.445473 | 1.89E-06 | 2.694034 | 4.941819 | 0.004455 |
| AOX1      | 2.269174 | 7.197862 | 2.36E-11 | 2.469175 | 6.282018 | 6.44E-05 |
| POM121L9P | 2.264301 | 1.755788 | 0.002727 | 2.205378 | 2.983997 | 0.001329 |
| LINC01088 | 2.133096 | -2.71421 | 0.044759 | 3.439059 | 1.030156 | 2.67E-06 |
| PER1      | 2.116311 | 4.298915 | 8.99E-11 | 2.165042 | 6.005285 | 1.58E-15 |
| TSC22D3   | 2.059884 | 5.637636 | 1.02E-07 | 2.092664 | 8.142146 | 1.52E-10 |
| KRT15     | -2.04715 | 0.28964  | 4.90E-04 | -5.59983 | 2.359236 | 7.93E-05 |
| GAP43     | -2.05724 | 0.308887 | 0.027793 | -2.02486 | 2.298992 | 0.002303 |

|         |          |          |          |          |          |          |
|---------|----------|----------|----------|----------|----------|----------|
| EHF     | -2.1198  | -0.59468 | 0.002435 | -2.95552 | -0.53237 | 0.017395 |
| ELOVL2  | -2.19882 | 2.970598 | 0.038038 | -2.00457 | 2.755107 | 1.36E-04 |
| ROBO4   | -2.22779 | -2.50759 | 0.020966 | -2.74161 | -0.83303 | 9.41E-04 |
| PKP1    | -2.31957 | -0.4564  | 0.044056 | -3.77574 | 1.054377 | 1.35E-04 |
| KCNN3   | -2.3687  | -2.6713  | 0.010176 | -2.05838 | -0.86625 | 3.79E-04 |
| FST     | -2.45314 | 7.46288  | 1.43E-05 | -2.04443 | 6.592413 | 1.18E-10 |
| MCHR1   | -3.09605 | 0.077106 | 0.002953 | -2.71202 | -0.3586  | 0.00281  |
| SLC7A14 | -3.14203 | 1.990144 | 1.45E-04 | -2.11287 | 1.399396 | 0.002158 |
| FAM19A3 | -3.7216  | -1.32076 | 4.21E-06 | -3.27296 | -1.49499 | 5.89E-04 |
| GJB2    | -4.36855 | -2.86834 | 0.00134  | -3.02598 | -1.53398 | 0.006085 |
| TP63    | -4.75466 | -1.9076  | 0.003015 | -2.41187 | -0.57334 | 0.006497 |

Note: *Group C*: DEGs that overlapping between Group A and Group B

**Table S3d:** List of top 50 Up/Down-regulated Genes from Group D

| Up-regulated genes |          |          |          | Down-regulated genes |          |          |          |
|--------------------|----------|----------|----------|----------------------|----------|----------|----------|
| Gene               | logFC    | logCPM   | P Value  | Gene                 | logFC    | logCPM   | P Value  |
| CCAT1              | 5.913344 | -2.70286 | 0.002979 | KRTAP4-7             | -4.64115 | -2.75702 | 0.002146 |
| CIDEC              | 5.78612  | -2.78275 | 0.001021 | TMEM108-AS1          | -4.27057 | -0.5583  | 0.001793 |
| NDST4              | 5.767665 | -2.75183 | 0.010945 | LRRN1                | -4.14203 | -3.63259 | 0.044332 |
| CNR1               | 5.689774 | 0.87157  | 0.001218 | FGF16                | -4.13737 | -2.99608 | 0.016576 |
| FAM105A            | 5.647441 | 2.781821 | 3.79E-10 | SPATA31E1            | -4.11655 | -3.07267 | 0.006086 |
| ALOX15B            | 5.638745 | 0.257532 | 1.95E-08 | SUCNR1               | -4.09291 | -3.04633 | 0.005503 |
| SAA2-SAA4          | 5.290503 | -3.08574 | 8.83E-04 | CCDC141              | -4.08231 | -3.05163 | 0.002129 |
| UBA52P8            | 4.977612 | -3.26546 | 0.00223  | SERPINB2             | -3.73461 | 2.275158 | 6.92E-04 |
| PNMT               | 4.936361 | -3.25641 | 0.003935 | GABRA4               | -3.69131 | -1.92586 | 0.011211 |
| CCL3L3             | 4.891576 | -3.29353 | 0.012138 | ELOVL2-AS1           | -3.61024 | -2.88914 | 0.013646 |
| ALOX5AP            | 4.836676 | -0.54226 | 2.57E-07 | IVL                  | -3.55164 | 3.96E-04 | 0.003206 |
| FAM107A            | 4.811483 | 0.917285 | 1.42E-05 | INSM2                | -3.54622 | -2.64853 | 0.032325 |
| LINC00964          | 4.523061 | -2.6008  | 0.001364 | LCE3A                | -3.52099 | -2.26775 | 0.016712 |
| ACKR1              | 4.504368 | 0.126657 | 0.021377 | LCE1C                | -3.49153 | -3.31426 | 0.019634 |
| CADM3-AS1          | 4.46674  | -3.48871 | 0.034944 | NTSR1                | -3.47662 | 0.253475 | 0.008717 |
| OR3A1              | 4.426009 | -3.48658 | 0.010772 | TGFA                 | -3.42263 | 0.170103 | 0.006218 |
| RBMY1A3P           | 4.373364 | -3.52879 | 0.027555 | CXCR4                | -3.41723 | -1.98838 | 0.010154 |
| APOB               | 4.261701 | -1.74598 | 0.01705  | KRT19                | -3.40331 | 4.891026 | 1.92E-05 |
| LINC00332          | 4.254916 | -2.83157 | 0.012106 | RNU6-118P            | -3.39061 | -3.38484 | 0.035994 |
| ZNF840             | 4.240351 | -3.57816 | 0.032746 | MS4A12               | -3.36186 | -3.42068 | 0.043333 |
| SLC17A3            | 3.898265 | -2.99778 | 0.009722 | TNFRSF9              | -3.31793 | -2.97307 | 0.025971 |
| OMD                | 3.759902 | 0.540711 | 1.32E-04 | NR1D1                | -3.1518  | 2.813576 | 1.65E-12 |
| IP6K3              | 3.756283 | 1.007611 | 4.38E-07 | FER1L6               | -3.14159 | -2.30399 | 0.010493 |
| IL18               | 3.712121 | -1.16629 | 0.001141 | CYTIP                | -3.06451 | -2.15903 | 0.014672 |
| LIX1               | 3.620558 | -2.37076 | 0.014003 | CSF2                 | -3.05834 | -0.79702 | 0.00393  |
| CD163              | 3.570825 | -1.86626 | 0.031175 | RNU6-137P            | -2.9772  | -3.26842 | 0.007867 |
| KDF1               | 3.503209 | -2.82669 | 0.029132 | CDC20B               | -2.97361 | -2.95319 | 0.017313 |
| CDH20              | 3.485157 | 2.805804 | 2.95E-07 | KRT16                | -2.89471 | -0.55725 | 0.028857 |
| C10orf10           | 3.451466 | 4.12064  | 2.47E-04 | KRTAP4-12            | -2.81493 | -2.89381 | 0.019184 |
| NKD1               | 3.450642 | -1.5778  | 0.004903 | TACR1                | -2.74512 | -1.82516 | 0.007374 |
| WISP1              | 3.442528 | 2.116349 | 0.002748 | EVI2A                | -2.72873 | -1.2672  | 7.51E-04 |
| STK31              | 3.386502 | -2.10787 | 0.012172 | EBF3                 | -2.72184 | -2.56649 | 0.03766  |
| GDF7               | 3.382018 | -3.30062 | 0.034976 | GRPR                 | -2.66534 | 1.046002 | 4.37E-06 |
| HLF                | 3.360261 | -2.63573 | 0.031377 | IL1B                 | -2.62255 | 2.070758 | 1.37E-04 |
| SNORA9             | 3.355249 | -2.88268 | 0.001048 | CSNK1A1P1            | -2.61533 | -2.28419 | 0.024971 |
| GPR64              | 3.269424 | 0.864129 | 7.78E-05 | ESM1                 | -2.56555 | 6.962024 | 0.019522 |

|           |          |          |          |         |          |          |          |
|-----------|----------|----------|----------|---------|----------|----------|----------|
| PPP1R1B   | 3.250992 | -2.90152 | 0.025118 | GRIN2A  | -2.54737 | -0.36879 | 0.002351 |
| SERF1A    | 3.246102 | -3.34594 | 0.039961 | TRIML2  | -2.54023 | -1.33735 | 0.010246 |
| IL1R2     | 3.200496 | -2.58345 | 0.005751 | BCL2A1  | -2.52814 | -1.33764 | 0.0081   |
| SORBS2    | 3.186627 | 4.722545 | 1.09E-09 | IL1RN   | -2.51691 | -0.78863 | 0.019984 |
| IFNLR1    | 3.176104 | -2.9785  | 0.024329 | ERMN    | -2.49034 | -0.56562 | 0.002515 |
| TPRG1-AS1 | 3.147698 | -2.65822 | 0.002045 | PTHLH   | -2.4542  | 1.947604 | 0.002709 |
| NEBL      | 3.091387 | 0.896332 | 0.001423 | ALDH1A3 | -2.4271  | 5.95997  | 2.56E-09 |
| EFHD1     | 3.085808 | 0.75279  | 0.012593 | KCNK3   | -2.42547 | 0.497296 | 0.04803  |
| ANKRD1    | 3.072437 | 4.902271 | 5.86E-05 | NR1D2   | -2.42076 | 5.240801 | 9.88E-15 |
| PRR15     | 3.045917 | -1.13035 | 0.005165 | CDCP1   | -2.39784 | 5.178189 | 4.04E-07 |
| FOXO1     | 2.997491 | 3.322099 | 1.43E-04 | IFNWP2  | -2.3244  | -2.68881 | 0.046495 |
| GRIA1     | 2.995596 | -0.06457 | 0.036469 | USP50   | -2.31103 | -2.9698  | 0.028022 |
| LRRTM3    | 2.870623 | -1.40713 | 0.010561 | NRG1    | -2.30869 | 4.163404 | 3.49E-06 |
| LMO3      | 2.78625  | 1.694504 | 0.004888 | MIR146A | -2.28566 | 1.09297  | 0.00439  |

Note: *Group D*: Uniquely expressed DEGs of HTM cells exposed for 16h (Group A minus Group C)

**Table S3e:** List of top 50 Up/Down-regulated Genes from Group E

| Up-regulated genes |          |          |          | Down-regulated genes |          |          |          |
|--------------------|----------|----------|----------|----------------------|----------|----------|----------|
| Gene               | logFC    | logCPM   | P Value  | Gene                 | logFC    | logCPM   | P Value  |
| MYOC               | 5.786683 | 8.501142 | 6.47E-05 | NPY                  | -6.70151 | 2.337886 | 2.66E-04 |
| BHLHE22            | 4.795929 | -0.16536 | 0.005898 | PRSS22               | -6.38518 | -1.47254 | 8.02E-04 |
| APOD               | 4.740998 | 8.023247 | 1.18E-04 | LRRC26               | -6.30496 | 0.500688 | 0.001154 |
| PRODH              | 4.54025  | 2.918714 | 3.66E-11 | HOXB13               | -6.26252 | 1.925207 | 0.001245 |
| P2RY14             | 4.355578 | 1.076507 | 6.20E-08 | ACPP                 | -6.24787 | 5.740014 | 1.63E-04 |
| LSP1               | 4.283072 | 5.109946 | 4.60E-09 | RLN1                 | -6.19291 | 0.229894 | 0.001526 |
| SCN3A              | 4.248788 | 2.547229 | 7.88E-05 | KLK3                 | -6.19217 | 6.494438 | 3.79E-04 |
| PRR33              | 4.182477 | 0.924015 | 3.21E-08 | PRAC1                | -6.081   | -1.02086 | 0.002144 |
| IGF2               | 3.777841 | 6.594018 | 2.10E-09 | GIMAP1               | -6.03295 | -1.72779 | 1.51E-04 |
| IGF2-AS            | 3.771141 | -1.96988 | 3.91E-04 | KLK2                 | -6.00607 | 5.321405 | 8.81E-04 |
| LINC00702          | 3.565781 | 4.414582 | 8.68E-08 | KLK4                 | -5.94843 | 2.034524 | 0.002213 |
| SAMHD1             | 3.46755  | 7.654626 | 4.37E-14 | AQP1                 | -5.90064 | 6.706375 | 6.83E-09 |
| FHL5               | 3.453078 | -0.55363 | 0.001374 | MSMB                 | -5.77753 | 2.981128 | 0.002492 |
| STEAP4             | 3.272005 | 2.873029 | 4.60E-04 | ST14                 | -5.77001 | 0.500316 | 7.21E-04 |
| TRAV39             | 3.184529 | -1.04837 | 0.002723 | PAGE4                | -5.67683 | -0.50939 | 0.003169 |
| FMO2               | 3.162058 | 2.670166 | 4.63E-05 | TPSAB1               | -5.66112 | -0.27503 | 7.08E-04 |
| ANKRD2             | 3.10094  | 0.494111 | 6.55E-04 | TPSB2                | -5.64276 | -0.02604 | 0.001383 |
| CHI3L2             | 3.019697 | 3.101092 | 0.003799 | LINC01297            | -5.42824 | 0.161739 | 0.001658 |
| STOX1              | 2.978317 | 1.660544 | 0.005573 | HOXA10               | -5.36139 | -0.80501 | 3.15E-04 |
| KCNE1              | 2.952832 | 0.259925 | 9.97E-04 | GIMAP7               | -5.35117 | -1.16462 | 0.003777 |
| MIR5690            | 2.9135   | -1.95506 | 0.0026   | IGHG3                | -5.30586 | 1.084123 | 0.009352 |
| TLDC2              | 2.904924 | 1.184351 | 1.31E-06 | HOXA9                | -5.2873  | -1.6163  | 0.005055 |
| ADRA1B             | 2.895918 | 2.880945 | 2.01E-09 | HLA-DQB1             | -5.27142 | 0.069513 | 0.003274 |
| ADH1A              | 2.88262  | 1.394164 | 3.12E-04 | KRT5                 | -5.2671  | 1.442267 | 3.34E-04 |
| NTRK2              | 2.871932 | 5.180909 | 0.003317 | UPK3A                | -5.23658 | -0.57963 | 0.009173 |
| XRCC6P2            | 2.858951 | -0.32354 | 2.88E-05 | AZGP1                | -5.23442 | 3.090287 | 0.003695 |
| NEDD9              | 2.790817 | 7.654906 | 1.77E-05 | IGLC3                | -5.23234 | 0.617578 | 0.005658 |
| USP2               | 2.754429 | 2.387434 | 9.92E-05 | RAMP3                | -5.22737 | -0.65501 | 0.001978 |
| LINC00525          | 2.716197 | -2.25042 | 0.003534 | COL9A1               | -5.18985 | 1.745759 | 2.42E-05 |
| SLC16A10           | 2.714817 | 0.999613 | 0.001783 | DES                  | -5.18691 | 4.97087  | 5.67E-05 |
| FAS-AS1            | 2.693421 | -2.50119 | 0.011674 | MT1H                 | -5.17696 | -2.24801 | 0.003385 |
| SOAT2              | 2.679968 | -1.23965 | 0.004303 | FXYP3                | -5.16764 | 1.00437  | 6.76E-04 |
| MYBPHL             | 2.675798 | -2.4836  | 0.017486 | CCDC64B              | -5.16744 | -0.4844  | 6.07E-04 |
| ADH4               | 2.6586   | -1.13255 | 2.35E-04 | MMP7                 | -5.16594 | 0.817164 | 6.99E-04 |
| GALNT15            | 2.640343 | 4.553566 | 0.001341 | CHRNA2               | -5.16025 | 0.306457 | 0.001386 |
| LINC00704          | 2.63911  | -2.11364 | 0.005001 | GYLTL1B              | -5.0962  | -0.77806 | 8.74E-04 |

|           |          |          |          |           |          |          |          |
|-----------|----------|----------|----------|-----------|----------|----------|----------|
| FGFR4     | 2.629364 | 2.585506 | 0.001299 | PLVAP     | -5.06443 | 0.634955 | 5.30E-04 |
| RNA5SP111 | 2.620581 | -1.85238 | 0.02188  | SPDEF     | -5.00996 | 1.499005 | 8.58E-04 |
| TNFAIP8L3 | 2.611999 | 2.800751 | 2.60E-05 | CD177     | -4.98374 | 0.275334 | 0.002824 |
| TRPC3     | 2.600795 | 1.446691 | 0.001774 | SERPINB11 | -4.96923 | -0.10361 | 0.002876 |
| TIMP4     | 2.579974 | 1.921086 | 4.98E-05 | DIO3OS    | -4.93426 | -1.17936 | 0.007826 |
| FPR1      | 2.558859 | 0.451366 | 0.001327 | SFN       | -4.93102 | 0.825148 | 7.12E-05 |
| ACA59     | 2.544022 | -1.2974  | 4.81E-04 | KCNQ1     | -4.9203  | -1.8196  | 0.007267 |
| C3        | 2.519924 | 5.773602 | 0.011548 | HOXA13    | -4.91558 | 0.125708 | 4.15E-04 |
| SLCO4A1   | 2.503841 | 0.894804 | 0.031207 | FAM110D   | -4.90182 | -1.43618 | 0.006624 |
| MAP1LC3C  | 2.500321 | 2.824507 | 0.013682 | IRX4      | -4.89999 | -1.83535 | 0.004901 |
| MIR5685   | 2.497169 | -2.37282 | 0.006539 | HLA-DRA   | -4.88604 | 1.815739 | 0.002646 |
| KIAA1456  | 2.462965 | 3.18646  | 0.003078 | C1orf116  | -4.87612 | 0.877927 | 2.02E-04 |
| RAMP2-AS1 | 2.457799 | 0.756573 | 0.019992 | PDE9A     | -4.84261 | 0.385632 | 2.25E-05 |
| FAM46B    | 2.384404 | 4.720006 | 3.44E-06 | RAB25     | -4.78721 | -0.64192 | 9.59E-04 |

Note: *Group E*: Uniquely expressed DEGs of HTM cells exposed for 7d (Group B minus Group C)
